# Supplementary material for: Protective Effect of Quercetin and Ginger (Zingiber officinale) Extract against Dimethoate Potentiated Fluoride-Induced Nephrotoxicity in Rats
Source: MDPI journal article supplement (doi:10.3390/foods12091899), 2023-05-05
Supplement: s1 [file s1]

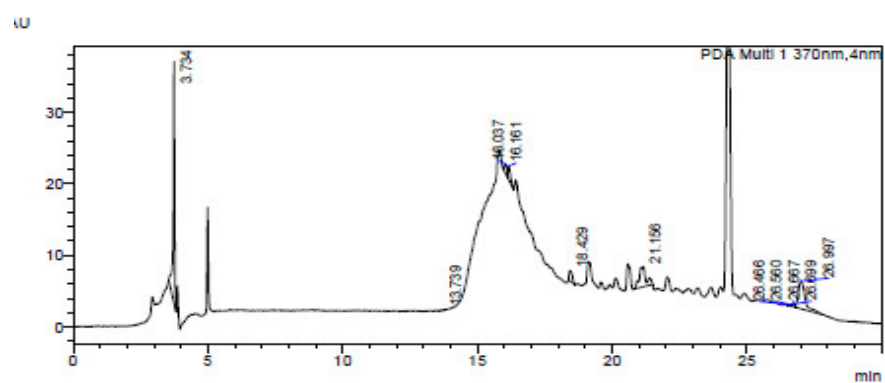

(a)

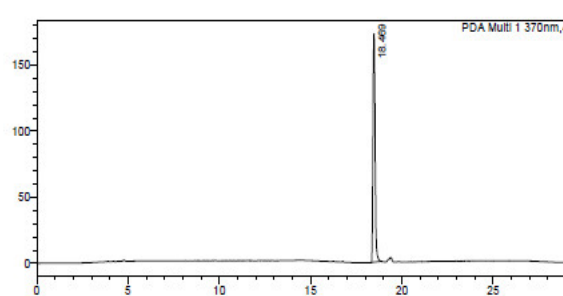

(b)

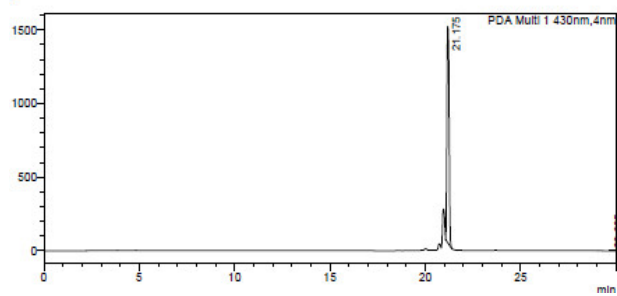

(c)

**Figure S1.** Representative chromatographic fingerprinting of ZO rhizome extract (a) along with the standard curcumin (b) and quercetin (c).
